# Supplementary material for: Artificial reticular structure by continuous titanium oxide frameworks
Source: Royal Society of Chemistry journal article supplement (doi:10.1039/c4ta01448k), 2014-01-01
Supplement: c4ta01448k1.pdf [file c4ta01448k1.pdf]

## Supporting Information

# Artificial Reticular Structure by Continuous Titanium Oxide Frameworks

Tatsuo Kimura\*

Advanced Manufacturing Research Institute, National Institute of Advanced Industrial  
Science and Technology (AIST), Shimoshidami, Moriyama-ku, Nagoya 463-8560,  
Japan.

**Table S1.** Characteristics of colloidal PS-*b*-PEO (molecular weight; 100,000-*b*-150,000) templated macroporous titania films (400 °C, Si{100} with 4 inch in diameter) prepared by changing spinning rate and amount of TTIP from that in the precursor solutions.

| Spinning rate<br>/ rpm | Amount of TTIP<br>/ g | Surface area<br>/ m <sup>2</sup> cm <sup>-3</sup> | Average film thickness<br>/ nm |
|------------------------|-----------------------|---------------------------------------------------|--------------------------------|
| 1500                   | 0.422                 | 69                                                | 227                            |
| 2000                   | 0.422                 | 57                                                | 202                            |
| 2500                   | 0.422                 | 131                                               | 98                             |
| 3000                   | 0.422                 | 124                                               | 97                             |
| 3000                   | 0.422                 | 124                                               | 97                             |
| 3000                   | 0.379                 | 135                                               | 72                             |
| 3000                   | 0.338                 | 111                                               | 78                             |
| 3000                   | 0.295                 | 147                                               | 61                             |
| 3000                   | 0.253                 | 203                                               | 36                             |
| 3000                   | 0.211                 | 263                                               | 32                             |

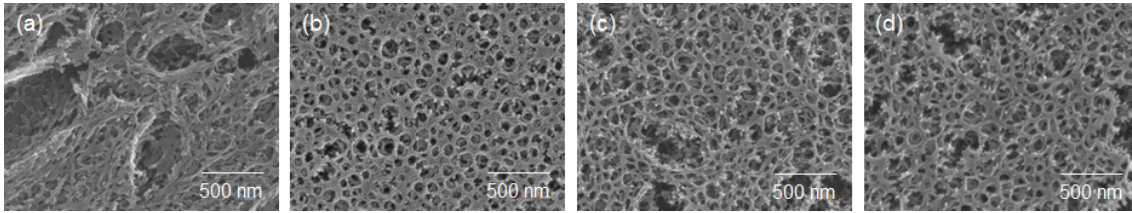

**Fig. S1** SEM images of colloidal PS-*b*-PEO (molecular weight; 100,000-*b*-150,000) templated macroporous titania films (1500 rpm, 400 °C, quartz) obtained by changing the final drying condition, (a, b) air-dried, (c) 50 °C, and (d) -20 °C followed by 50 °C, of spin-coated films prepared under the optimal synthetic conditions.

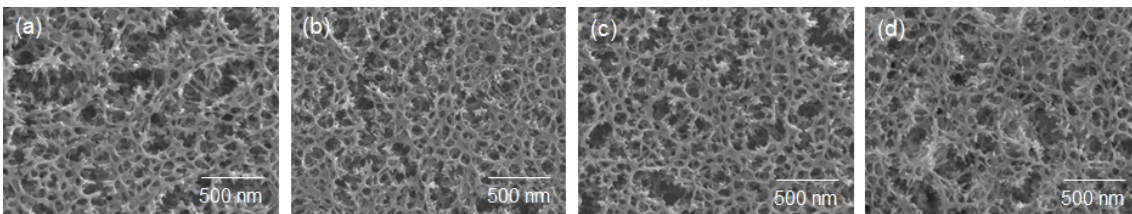

**Fig. S2** SEM images of colloidal PS-*b*-PEO (molecular weight; 100,000-*b*-150,000) templated macroporous titania films (1500 rpm, 400 °C) prepared under the optimal synthetic conditions over various substrates such as (a) quartz, (b) Si{100}, (c) glass, and (d) FTO.

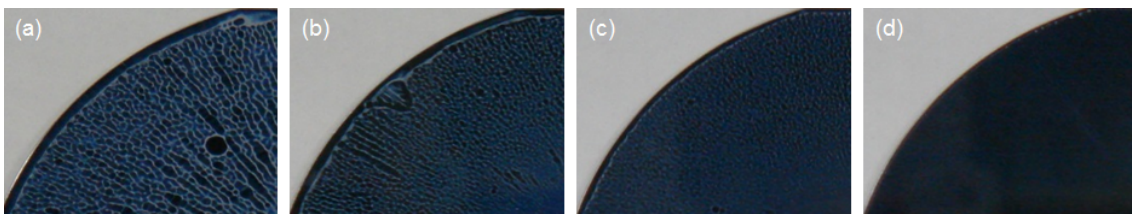

**Fig S3** Photographs of colloidal PS-*b*-PEO (molecular weight; 100,000-*b*-150,000) templated macroporous titania films (400 °C, Si{100} with 4 inch in diameter) prepared from the optimal precursor solution with spinning rates of (a) 1500 rpm, (b) 2000 rpm, (c) 2500 rpm, and (d) 3000 rpm.

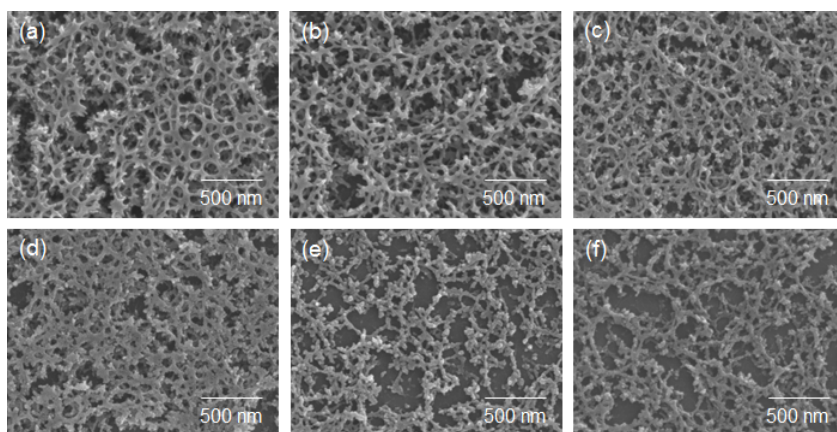

**Fig. S4** SEM images of colloidal PS-*b*-PEO (molecular weight; 100,000-*b*-150,000) templated macroporous titania films (3000 rpm, 400 °C, Si{100}) prepared by changing the amount of TTIP, (a) 0.422 g, (b) 0.379 g, (c) 0.338 g, (d) 0.295 g, (e) 0.253 g, and (f) 0.211 g, in the precursor solution.

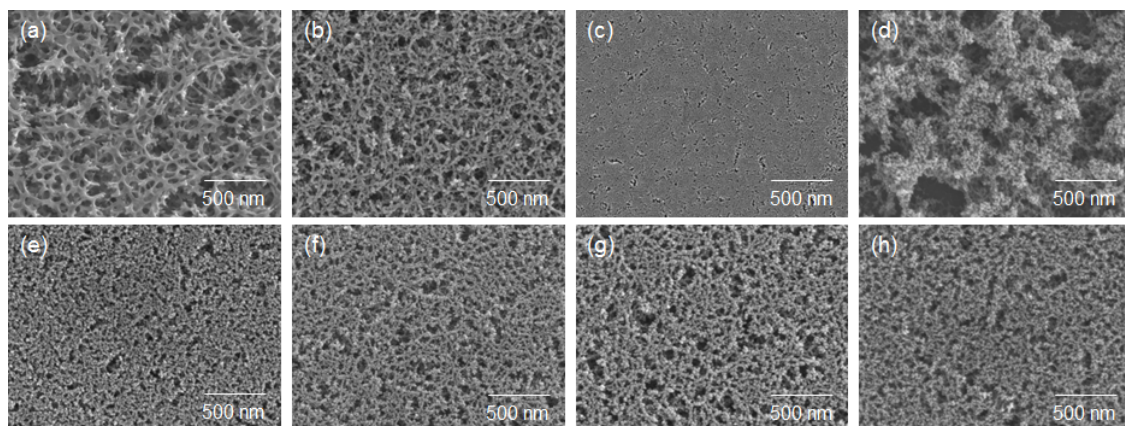

**Fig. S5** SEM images of colloidal PS-*b*-PEO templated macroporous titania films (1500 rpm, 400 °C, glass) prepared using PS-*b*-PEO with the molecular structures of (a) 100,000-*b*-150,000, (b) 12,200-*b*-23,900, (c) 16,000-*b*-7,500, (d) 35,000-*b*-17,000, (e) 2,700-*b*-4,000, (f) 40,000-*b*-53,000, (g) 58,600-*b*-71,000, and (h) 59,000-*b*-31,000.

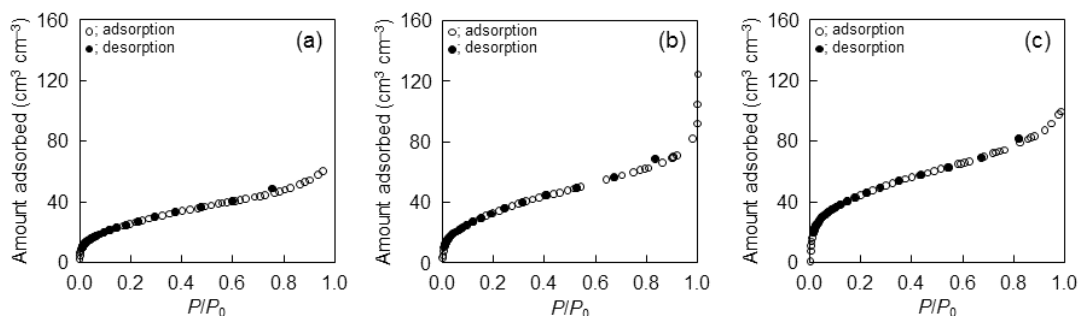

**Fig. S6** Kr adsorption-desorption isotherms of colloidal PS-*b*-PEO templated macroporous titania films (3000 rpm, 400 °C, Si{100}) prepared using PS-*b*-PEO with molecular structures of (a) 100,000-*b*-150,000, (b) 12,200-*b*-23,900, and (c) 16,000-*b*-7,500.

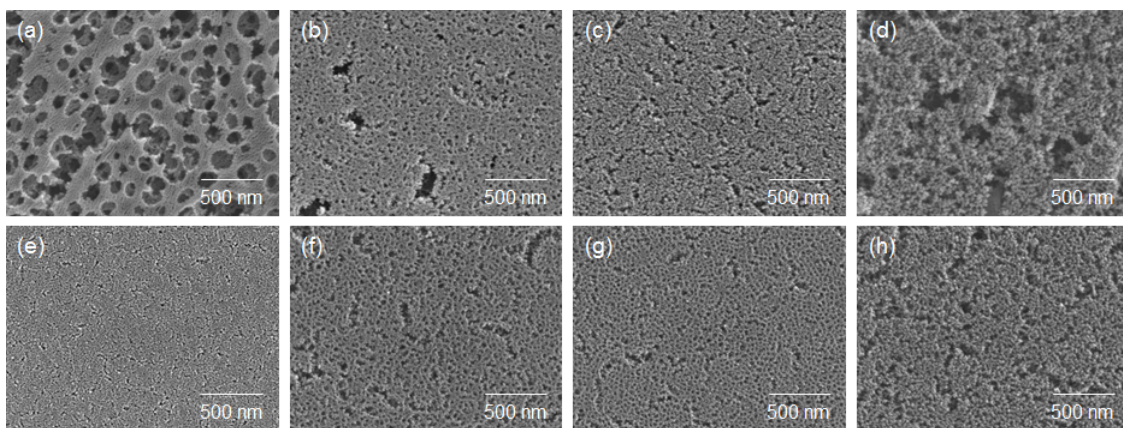

**Fig. S7** SEM images of titania films (1500 rpm, 400 °C, glass) prepared using PS-*b*-PEO with the molecular structures of (a) 100,000-*b*-150,000, (b) 12,200-*b*-23,900, (c) 16,000-*b*-7,500, (d) 35,000-*b*-17,000, (e) 2,700-*b*-4,000, (f) 40,000-*b*-53,000, (g) 58,600-*b*-71,000, and (h) 59,000-*b*-31,000; all the syntheses were conducted by using 1,4-dioxane as a solvent.
